# 1 Identification of colorectal malignancies enabled by phasor-based 2 autofluorescence lifetime macroimaging and ensemble learning

3  
4 João L. Lagarto,<sup>a,\*</sup> Alberto I. Herrando,<sup>a,b</sup> Rafaela Rego,<sup>c</sup> Laura Fernández,<sup>b</sup> José  
5 Azevedo,<sup>b</sup> Hugo Domingos,<sup>b</sup> Pedro Vieira,<sup>b</sup> Amjad Parvaiz,<sup>b</sup> Vladislav I. Shcheslavskiy,<sup>d,e</sup>  
6 Pedro G. Silva,<sup>a</sup> Mireia Castillo-Martin,<sup>c</sup>  
7  
8

9 <sup>a</sup>Champalimaud Foundation, Biophotonics Platform, Lisbon, Portugal

10 <sup>b</sup>Champalimaud Foundation, Digestive Unit, Lisbon, Portugal

11 <sup>c</sup>Champalimaud Foundation, Pathology Service, Biophotonics Platform, Lisbon, Portugal

12 <sup>d</sup>Becker and Hickl GmbH, Berlin, Germany

13 <sup>e</sup>Privolzhsky Research Medical University, Nizhny Novgorod, Russia  
14

## 15 Abstract

16 **Significance:** Colorectal cancer (CRC) remains one of the most frequent cancers and a leading contributor to cancer-  
17 associated mortality globally. CRCs are often diagnosed at an advanced stage, which leads to high mortality and  
18 morbidity. This outcome is exacerbated by high rates of recurrence and postoperative complications that contribute  
19 substantially to poor prognosis. Advancements in endoscopic assessment have improved CRC prevention, early  
20 detection, and surveillance over the years. Yet, CRC remains one of the most significant health challenges of the 21st  
21 century. Label-free optical spectroscopy methods have long been explored as potential partners to endoscopy, not only  
22 to enhance diagnostic accuracy but also to confer predictive capabilities to endoscopic evaluations.

23 **Aim:** We investigated the potential of time-resolved autofluorescence measurements excited at 375 nm and 445 nm  
24 to correctly classify benign and malignant tissues in CRC surgical specimens from 117 patients.

25 **Approach:** Multiparametric autofluorescence lifetime data were collected in two distinct datasets, which were used  
26 for training (n = 73) and testing (n = 44) a supervised ensemble learning classification model, with standard  
27 histopathology assessment serving as ground truth.

28 **Results:** Using 5-fold cross-validation, we achieved  $82.6 \pm 0.02\%$  sensitivity,  $90.4 \pm 0.01\%$  specificity,  $87.4 \pm 0.01\%$   
29 accuracy, and  $0.941 \pm 0.004$  area under the curve (AUC) for training data. Evaluation on unseen test data yielded  
30 similar results, with 85.2% sensitivity, 84.5% specificity, 84.8% accuracy, and 0.915 AUC.

31 **Conclusions:** While preliminary, our findings underscore the potential impact of AI-assisted autofluorescence lifetime  
32 measurements in advancing CRC prevention, early detection, and surveillance efforts.

33  
34 **Keywords:** autofluorescence lifetime, colorectal cancer, machine learning, phasors, label-free, diagnosis, disease  
35 monitoring.

36  
37 \*João L. Lagarto, E-mail: [joao.lagarto@research.fchampalimaud.org](mailto:joao.lagarto@research.fchampalimaud.org)  
38

## 39 1 Introduction

40 Colorectal cancer (CRC) is the third most common cancer worldwide and ranks second in  
41 cancer-related mortality. This sobering statistic is largely attributed to nearly 70% of patients being

42 diagnosed at an advanced stage of the disease, when treatment options are more restricted and less  
43 effective. Despite some encouraging trends indicating an overall decrease in incidence and  
44 mortality in recent years, there has been a steady rise in the incidence of CRC among younger  
45 individuals under 50 years of age <sup>1</sup>. Currently, this demographic accounts for 13% of colon cancers  
46 and 16% of rectal cancers, and these figures are expected to nearly double by 2030, as screening  
47 remains particularly low among younger individuals <sup>2</sup>. As CRC stands as a significant health  
48 challenge for the foreseeable future, it is imperative to improve prevention and early detection of  
49 precursor lesions that can become malignant over time and, in this way, decrease CRC-associated  
50 mortality.

51 Endoscopic assessment is the cornerstone of CRC prevention, early detection, and  
52 surveillance, enabling detection of pre-malignant lesions and early-stage cancer across the anus,  
53 rectum, and the entire length of the colon <sup>3</sup>. Despite its effectiveness, the information obtained  
54 from the standard endoscopic evaluation is limited and may not fully characterize the structural,  
55 molecular, and metabolic features of detected lesions. This limitation can hinder the ability to  
56 accurately predict which polyps will progress to cancer, leading to challenges in determining the  
57 optimal surveillance strategy for patients. Chromoendoscopy and other advanced imaging  
58 techniques such as Narrow Band Imaging (NBI) or Flexible Spectral Imaging Color Enhancement  
59 (FICE) can enhance the discriminatory potential of standard endoscopy <sup>4</sup>. Yet, characterization of  
60 lesions is still challenging and often correlated to the endoscopist's training and experience <sup>5</sup>.

61 To overcome these limitations, advanced label-free optical spectroscopy methods have  
62 emerged as promising partners to standard white light endoscopy, owing to their increased  
63 sensitivity to molecular, structural, and metabolic alterations in tissues, without requiring the  
64 introduction of potentially toxic exogenous labels. Among them, multispectral autofluorescence

65 lifetime imaging and spectroscopy have been widely exploited with demonstrated success in a  
66 broad range of clinical applications, with particular emphasis on cancer detection and margin  
67 assessment <sup>6–10</sup>. Moreover, multiple studies have shown that autofluorescence lifetime  
68 measurements can provide substantial diagnostic information that goes beyond classification of  
69 benign and malignant tissues <sup>11</sup>. In recent years, translation of this technique into clinical practice  
70 has been accelerated by the flourishing of Artificial Intelligence (AI) systems and the development  
71 of increasingly sophisticated machine learning and deep learning models. AI models have been  
72 employed in data processing to outperform traditional methods <sup>12</sup>, tissue classification <sup>13,14</sup>,  
73 delineation of margins <sup>15,16</sup>, or determination of metabolic phenotypes <sup>17</sup>.

74 Clearly, AI-assisted autofluorescence lifetime measurements can have tremendous impact in  
75 clinical decision-making, by enabling rapid tissue assessment, precise delineation of margins, or  
76 categorization of lesions, beyond what conventional systems can offer. In a previous study, we  
77 characterized the tissue-level autofluorescence signatures of normal, adenoma, and tumor tissues  
78 considering the underlying clinicopathological features <sup>18</sup>. While we reported significant  
79 differences between tissues in various characteristics, there was considerable overlap in the data  
80 owing to a large intra- and interpatient variability. Moreover, in a selected number of cases, we  
81 observed opposite autofluorescence patterns that we could not explain, making the interpretation  
82 of the data and its categorization quite challenging with the naked eye. Here, we continued our  
83 work towards practical clinical implementation, focusing on quantifying the differences previously  
84 observed and demonstrating that fiber-based autofluorescence lifetime measurements can provide  
85 rapid diagnostic information with high accuracy. To that end, a supervised ensemble learning  
86 model was applied to multiparametric autofluorescence lifetime data obtained from CRC surgical  
87 specimens for classification of colorectal tissues and identification of malignant lesions, using

88 histopathologic assessment as ground truth. Data were collected from two distinct datasets (total  
89 of 117 patients), which were used independently for training (n = 73 patients) and testing (n = 44  
90 patients) of the supervised model. We tested and evaluated various predictive classification  
91 models, each based on different sets of spectroscopic features derived from phasor analysis of  
92 autofluorescence decay data. The results presented here, while preliminary, are indicative of the  
93 potential of AI-assisted autofluorescence lifetime measurements for classification of colorectal  
94 lesions and identification of malignancies.

## 95 **2 Methods**

### 96 *2.1 Autofluorescence lifetime setup*

97 The optical instrument used for collection of autofluorescence data consisted of a time and  
98 spectrally resolved autofluorescence macro-imaging system with multiplexed excitation at 375 nm  
99 and 445 nm. A complete description of this system is provided elsewhere<sup>18,19</sup>. Briefly, two ps-  
100 pulsed laser sources (BDS-SM-375 and BDS-SM-445, Becker and Hickl GmbH, Germany)  
101 operating at 20 MHz repetition rate were multiplexed at 50 Hz, so that each wavelength excited  
102 the sample alternately in 20 ms periods. Excitation light was delivered to the sample via a custom  
103 optical fiber bundle (FiberTech Optica, Canada) with a single 300  $\mu\text{m}$  fiber for excitation  
104 (NA=0.22). The resulting autofluorescence signal was collected by a set of 200  $\mu\text{m}$  optical fibers  
105 (NA=0.22) circularly arranged around the excitation fiber and subsequently delivered to the  
106 detection system consisting of a wavelength selection module and three photon-counting hybrid  
107 detectors (HPM-100-40-CMOUNT, Becker and Hickl GmbH). The wavelength selection module  
108 included of a set of mirrors and filters that divided the autofluorescence signal in three spectral  
109 bands of interest, selected to isolate the autofluorescence from key endogenous fluorophores: 380

110  $\pm 20$  nm,  $472 \pm 14$  nm, and  $525 \pm 25$  nm. This excitation-collection geometry provides a total of  
111 five detection channels, see Supplementary Table 1. The hybrid detectors were connected to a  
112 single router (HRT-41, Becker and Hickl GmbH) that serialized photon events to a time-correlated  
113 single photon counting (TCSPC) acquisition card (SPC-130 EM, Becker and Hickl GmbH) that  
114 recorded the fluorescence decay curve for each detection channel.

115 A key feature of this system is the ability to record TCSPC autofluorescence lifetime data in  
116 bright conditions, owing to the synchronization of the fluorescence acquisition with an external  
117 light source that provides periodic white illumination to the sample at 50 Hz<sup>19,20</sup>. A USB color  
118 camera (FFY-U3-16S2C-C, FLIR, USA) was also used to record and provide spatial feedback of  
119 the measurements. The spatial resolution of the system is primarily determined by the geometry  
120 of the fiber arrangement, NA of the fibers, and probe-to-target distance. Variations in probe-to-  
121 target distance can cause fluctuations in the excitation spot size and collection efficiency, while  
122 inconsistent scanning speed may lead to spatial undersampling and reduced signal quality<sup>20</sup>. While  
123 it is challenging to accurately determine the spatial resolution of our system, we estimate it to be  
124  $\sim 1$  mm, under ideal conditions.

125 It is noteworthy that throughout this study we used two slightly different fiber bundles,  
126 consisting of either six or seven collection fibers. We used this difference as basis for splitting the  
127 data into training and test sets, as described in detail below.

## 128 *2.2 Sample collection and data acquisition*

129 Colorectal surgical specimens were collected under the Champalimaud Foundation Biobank  
130 Informed Consent, clinical protocol 2021020203 approved by the Champalimaud Foundation  
131 Ethics Committee. Following surgical resection, samples were immediately transported to the  
132 Pathology Service laboratory, where they were opened and cleaned for autofluorescence

133 measurements, which were typically carried out within 1 hour of the final vascular ligation and 15  
134 minutes of complete resection<sup>18</sup>. The autofluorescence acquisition consisted of hand-scanning a  
135 large region of the specimen using the fiber optic probe (areas as large as 25 cm<sup>2</sup> were measured),  
136 including the suspicious malignant lesion and the surrounding normal tissue. The position of the  
137 fiber was determined for each TCSPC measurement using the images captured with the color  
138 camera, thus permitting autofluorescence maps to be generated, as illustrated in Fig. 1. Following  
139 measurements, specimens were routinely processed for diagnosis. A total of 118 colorectal  
140 samples were collected from 117 patients.

### 141 2.3 Data preprocessing

142 Pre-processing of data encompassed three crucial steps. First, raw single-point  
143 autofluorescence lifetime data were analyzed and the corresponding autofluorescence maps  
144 generated. Second, regions of interest (ROI) were defined in each specimen in both lesional and  
145 non-lesional areas, guided by histopathology diagnosis. Finally, pixel-wise autofluorescence data  
146 were averaged within each ROI (feature extraction).

#### 147 2.3.1 Analysis of autofluorescence data

148 Autofluorescence intensity decays were processed according to the phasor transformation<sup>21</sup>  
149 using the instrument response function (IRF) as reference ( $\tau_{\text{ref}} = 0$  ns). In detail, each  
150 autofluorescence decay  $I(t)$  was transformed from the time-domain to the Fourier space and the  
151 corresponding phasor coordinates  $g$  and  $s$  were calculated according to Eq. 1 and 2, where  $T$  is the  
152 period of the laser repetition ( $T = 50$  ns).

$$g = \frac{\int_0^T I(t) \cos(2\pi t/T) dt}{\int_0^T I(t) dt} \quad (1)$$

$$s = \frac{\int_0^T I(t) \sin(2\pi t/T) dt}{\int_0^T I(t) dt} \quad (2)$$

153  
154 From the coordinates  $g$  and  $s$ , characteristic phase and modulation lifetimes ( $\tau_p$  and  $\tau_m$ ,  
155 respectively) were obtained from the following relations:

$$\tau_p = \frac{T}{2\pi} \frac{s}{g} \quad (3)$$

$$\tau_m = \frac{T}{2\pi} \sqrt{\frac{1}{g^2 + s^2} - 1} \quad (4)$$

156  
157 All fluorescence decays were processed for background correction prior to the phasor  
158 transformation. Measurements containing fewer than 50 photons and 10 peak counts were  
159 excluded from the analysis to guarantee the accuracy and precision of lifetime estimation<sup>21</sup>. The  
160 IRF was measured for all channels (by removing band-pass filters) using excitation light scattered  
161 off a reflective surface. Fluorescence lifetime measurements of the system were validated using  
162 POPOP ( $\tau = 1.36$  ns in ethanol<sup>22</sup>) and Coumarin 6 ( $\tau = 2.72$  ns in ethanol<sup>23</sup>), for 375 nm and 445  
163 nm excitation, respectively.

164 In addition to the fluorescence lifetime analysis, we calculated the fractional autofluorescence  
165 intensity  $F$  measured in each detection channel with respect to the total autofluorescence signal for  
166 each excitation wavelength. Hence, we extracted five parameters representative of the  
167 autofluorescence decay curve in each channel ( $g, s, \tau_p, \tau_m, F$ ), i.e. a total of 25 parameters for five  
168 detection channels. The feature pool was completed by the normalized optical redox ratio (RR),  
169 calculated as follows,

$$RR = \frac{I_2}{I_2 + I_5} \equiv \frac{NAD(P)H}{NAD(P)H + FAD} \quad (5)$$

170

171 where  $I_2$  and  $I_5$  denote the absolute autofluorescence intensity in detection channels 2 and 5,  
172 respectively.

### 173 2.3.2 *Diagnosis and data labelling*

174 Following optical measurements, surgical specimens were sent for routine histological  
175 processing and diagnosis, which established the ground truth for the supervised learning model.  
176 The process of obtaining ground truth data (labelling) from fresh surgical specimens and  
177 subsequent feature extraction is depicted in Fig. 1. Because specimens were sectioned vertically  
178 and perpendicular to the surface of measurements (i.e. to the optical map) according to the bread  
179 loaf technique, it was impossible to obtain a one-to-one correlation of histological and optical  
180 features. Accordingly, the exact origin of each slice on the measured specimen, i.e. prior to fixation  
181 in formalin, could not be determined either. These limitations cannot be easily circumvented  
182 without causing major disruptions to the histopathology workflow; thus, our analysis relied on the  
183 macroscopic assessment of the lesions by experienced pathologists and subsequent confirmation  
184 by microscopic examination of the most representative histology slide. Based on this assessment,  
185 we traced and identified the lesions as accurately as possible in the white light image captured  
186 during optical measurements from which we selected ROIs, as illustrated in Figure 1. To mitigate  
187 the limitations, ROIs were drawn conservatively within the lesion, following simple guidelines: 1)  
188 ROIs were kept small ( $\sim 20 \times 20$  pixels); 2) in case the borders of the lesion were ill-defined, ROIs  
189 were drawn closer to the center of the lesion; 3) ROIs in normal tissues were drawn as remotely  
190 as possible from any visible lesion. Where possible, a maximum of three ROIs were drawn per  
191 sample and tissue type, as sparsely distributed as possible. This was to capture the spatial  
192 heterogeneity of the tissue. Optical data were averaged within in each ROI. ROIs were labelled as  
193 *benign* or *malignant* according to histopathological diagnosis, where *benign* included benign



194 lesions (i.e. adenomas) and normal tissues. We opted for a binary rather than a multiclass  
 195 classification model given the low number of adenoma lesions in our dataset. The number of  
 196 patients and ROIs included in our analysis is indicated in Table 1.

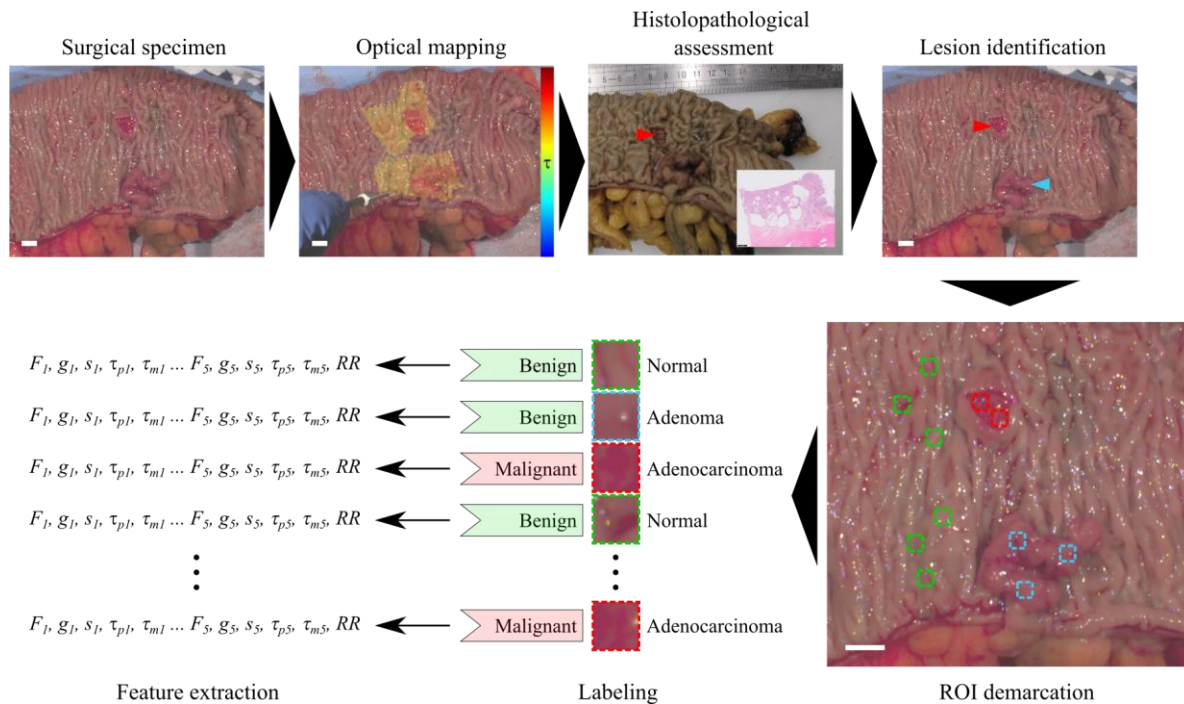

197  
198

199 Figure 1. Study workflow for every collected sample. The surgical specimen is transported to the optical laboratory  
 200 immediately after resection and typically within 1 hour of the last vascular ligation. Optical measurements are  
 201 carried out in fresh tissue before histopathological processing and assessment. Following diagnosis, benign and  
 202 malignant lesions are identified in the white light image, and regions of interest (ROI) are demarcated.  
 203 Autofluorescence parameters are averaged within each ROI and mean values are taken as characteristic features.  
 204 Each ROI is labelled as benign or malignant according to histopathological diagnosis. Scale bars 10 mm.

## 205 2.4 Tissue classification

### 206 2.4.1 Training and test datasets

207 To ensure validity and reliability of the results, data were divided into two independent groups,  
 208 as indicated in Table 1. Data were assigned to either training or test group according to the fiber

209 bundle used during the acquisition: training data were acquired with a fiber bundle consisting of  
210 seven collection fibers and test data were acquired with an identical fiber bundle, but with six  
211 collection fibers only. As expected, difference between fibers had no impact in the measured  
212 fluorescence lifetimes (see Fig. 2A) given the ratiometric nature of the fluorescence lifetime  
213 measurement. A total of 672 observations (ROIs) were included in this study (see Table 1 for  
214 details). The training dataset included 428 observations (63.7%) of which 167 (39.0%) were  
215 labelled as malignant. The test dataset consisted of 244 observations (36.3%), including 108  
216 (44.2%) labeled as malignant. The number of observations in both datasets was relatively well-  
217 balanced between the two classes (benign and malignant), thus requiring no additional balancing  
218 corrections. The raw data from the training dataset served as basis for a recent study on optical  
219 characterization of CRC <sup>18</sup>.

220 Table 1. Patient numbers and observations in training and test datasets.

|                                      | Training data |         | Test data |         |
|--------------------------------------|---------------|---------|-----------|---------|
|                                      | N             | %       | N         | %       |
| <b>Number of patients</b>            | 73            | -       | 44        | -       |
| <b>Number of samples measured</b>    | 74            | -       | 44        | -       |
| <b>Number of observations (ROIs)</b> | 428           | (63.7%) | 244       | (36.3%) |
| <b>Normal</b>                        | 237           | (55.4%) | 128       | (52.5%) |
| <b>Adenoma</b>                       | 24            | (5.6%)  | 8         | (3.3%)  |
| <b>Adenocarcinoma</b>                | 167           | (39.0%) | 108       | (44.2%) |
| <b>Benign</b>                        | 261           | (61.0%) | 136       | (55.8%) |
| <b>Malignant</b>                     | 167           | (39.0%) | 108       | (44.2%) |

221

222 *2.4.2 Hyperparameter optimization and training*

223 An Adaptive Boosting algorithm (AdaBoostM1) was evaluated for binary classification of  
224 autofluorescence data in CRC samples <sup>24</sup>. Boosting is an ensemble learning method that

225 sequentially combines the prediction of multiple weak learners (decision trees) to obtain a strong  
 226 classifier. The model was implemented in Matlab 2022a (Mathworks, USA) using the *fitcensemble*  
 227 function. The machine learning pipeline is illustrated in Fig. 2B. The model was first explored  
 228 with training data for various combinations of hyperparameters using 5-fold cross validation.  
 229 Model hyperparameters (learning rate, number of weak learners, and maximum nodes per weak  
 230 learner) were tuned iteratively using Bayesian optimization to minimize the cross-validation loss  
 231 function over 60 evaluation cycles. A range of values was specified for each hyperparameter with  
 232 the aim of overcoming underfitting and overfitting (see Table S2). The optimal hyperparameter  
 233 vector was found at the minimum cross-validation loss and used to estimate performance of the  
 234 model. The model was then trained using the complete training dataset, i.e. without partitioning  
 235 data for cross-validation. Supplementary Fig. S1 shows the variation of the objective function over  
 236 60 optimization cycles.

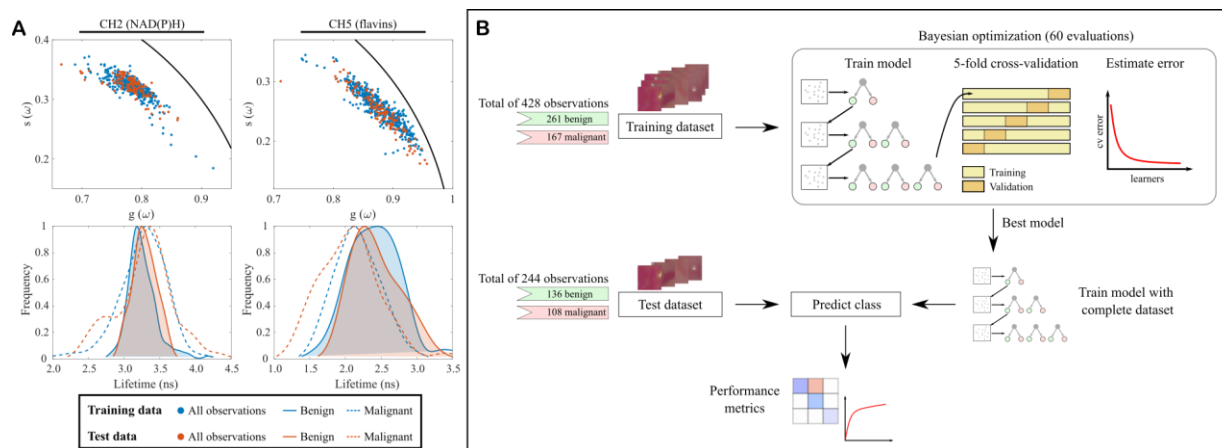

237  
 238 Figure 2. A) Phasor plots (top row) and phase lifetime (bottom) distribution in benign and malignant tissues for  
 239 training and test dataset, measured in CH2 (left) and CH5 (right), respectively. B) Machine learning pipeline. A  
 240 dataset consisting of 428 observations is used to train a boosting algorithm. The best hyperparameter vector was  
 241 found through Bayesian optimization with 5-fold cross-validation. Final model performance was evaluated against  
 242 an independent test set consisting of 244 observations.

### 243 2.4.3 Model evaluation and performance metrics

244 Performance of the model was first estimated on training data using the optimal set of  
245 hyperparameters with 5-fold cross validation. The model was trained 20 times and performance  
246 metrics were averaged out. Independent evaluation of the model was conducted on the test dataset.  
247 Common metrics such as accuracy, sensitivity, specificity, positive predictive value (PPV),  
248 negative predictive value (NPV), and area under the receiver operating characteristic curve (AUC-  
249 ROC) were computed. In addition, we measured the Mathews correlation coefficient (MCC),  
250 which has been shown to be more informative than other metrics for evaluation of binary  
251 classification models<sup>25</sup>. Since our aim was to identify malignant lesions from surrounding normal  
252 tissues and benign lesions, such as adenomatous polyps, the following definitions were used: true  
253 positive (TP) rate was defined as the percentage of correctly classified malignant lesions; true  
254 negative (TN) rate was defined as the percentage of correctly classified normal tissues or benign  
255 lesions; false positive (FP) rate was defined as the percentage of normal tissue classified as  
256 malignant; and false negative (FN) rates were defined as the percentage of malignant tissues  
257 classified as normal.

## 258 **3 Results**

### 259 3.1 Class separation

260 We first investigated the autofluorescence lifetime signatures of benign and malignant tissues  
261 obtained from test data. Fig. 3A shows the distribution of data in phasor coordinates for all  
262 detection channels, where each observation corresponds to a single point in the phasor cloud. The  
263 corresponding phase and modulation lifetimes are plotted in Fig. 3B. Redox ratio and normalized  
264 fluorescence intensity data are provided in Supplementary Fig. S2. These data are consistent and

265 support our previous results on the training data<sup>18</sup>. Specifically, malignant tumors exhibit shorter  
 266 lifetimes in channels 1 and 5, whereas lifetime differences in the remaining channels are more  
 267 subtle. Likewise, the autofluorescence signals emanating from NAD(P)H do not appear to offer a  
 268 relevant source of contrast between tissues. Rather, in detection channels 2 and 3, results depict a  
 269 wider distribution of data originating from malignant tissues. Such findings suggest increased  
 270 heterogeneity, potentially associated to diverse metabolic phenotypes harbored in the tumors. This  
 271 heterogeneity is best illustrated in the phasor plots but also evident in Fig. 3B.

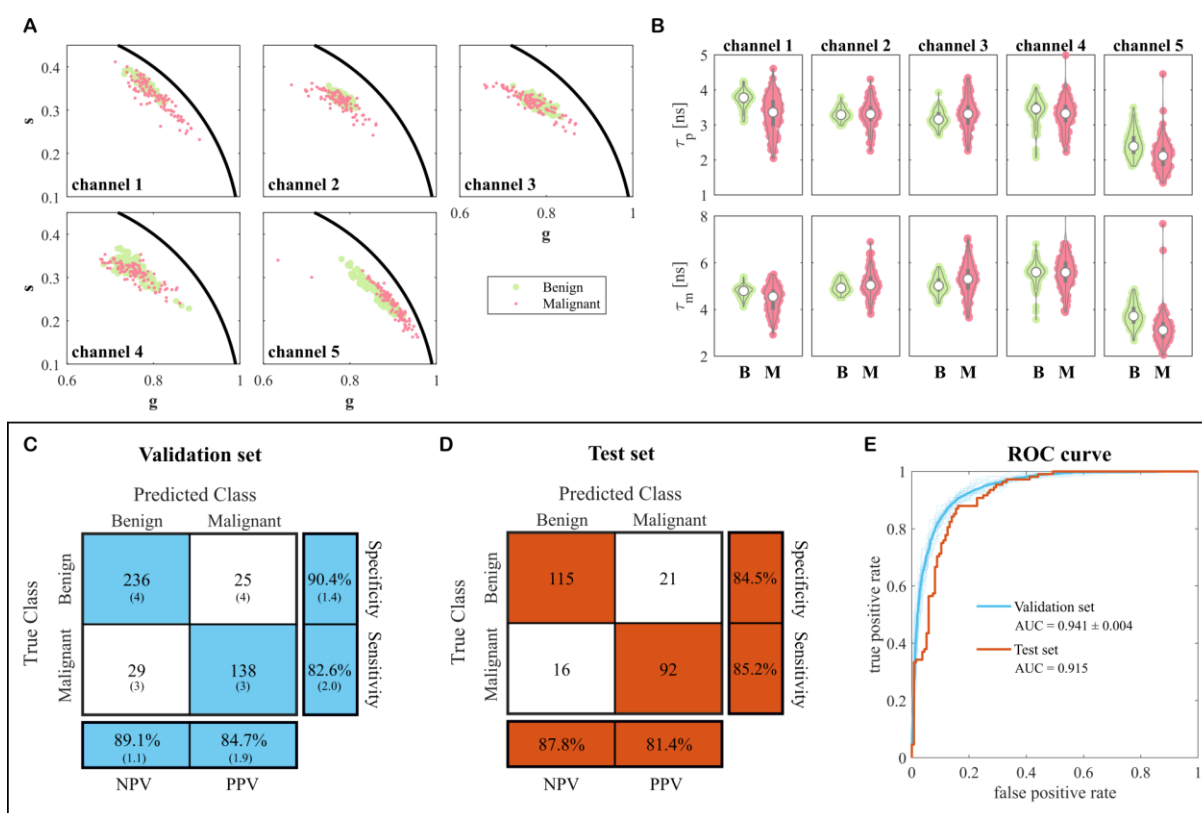

272  
 273 Figure 3. A) Phasor distribution of test data in all detection channels. B) Average phase and modulation lifetimes  
 274 measured in benign (B) and malignant (M) ROIs. Panels C and D show confusion matrices for training (cross  
 275 validated) and test sets, respectively. TP, TN, FP, and FN values are rounded to the closest integer following an  
 276 averaging of 20 iterations. Percentage values are calculated using the original “unrounded” values. Values in  
 277 parenthesis represent SD. E) ROC curves for cross validation (in cyan) and test (in orange) sets. Solid lines indicate

278 the average ROC curves for 20 iterations of the model. Shaded lines in blue represent the ROC curve for each  
279 iteration.

### 280 3.2 Tissue classification and model performance

281 Table 2. Performance metrics for training and test datasets. Metrics on training data were obtained by averaging over  
282 20 iterations of cross validation.

|                               | Training data | Test data |
|-------------------------------|---------------|-----------|
| <b>Number of observations</b> | 428           | 244       |
| <b>Sensitivity</b>            | 0.826 ± 0.020 | 0.852     |
| <b>Specificity</b>            | 0.904 ± 0.014 | 0.845     |
| <b>Accuracy</b>               | 0.874 ± 0.008 | 0.848     |
| <b>PPV</b>                    | 0.847 ± 0.019 | 0.814     |
| <b>NPV</b>                    | 0.891 ± 0.011 | 0.878     |
| <b>MCC</b>                    | 0.733 ± 0.022 | 0.695     |
| <b>AUC-ROC</b>                | 0.941 ± 0.004 | 0.915     |

283  
284 Following initial characterization of the test dataset and confirmation of the trends previously  
285 obtained with the training dataset, we evaluated the ability of our autofluorescence lifetime system  
286 to predict malignancy from single point measurements using the supervised ensemble learning  
287 model. Performance of the model was first estimated on training data using the optimal set of  
288 hyperparameters with 5-fold cross-validation, as previously described in 2.4.2. The results  
289 presented in Fig. 3C and Table 2 indicate the model performs well on the training dataset,  
290 achieving an accuracy of 87.4% ± 0.01%, AUC of 0.941 ± 0.004, and MCC of 0.733 ± 0.022. It  
291 excels particularly in the classification of benign tissues, with NPV ranging from 88.0% to 91.2%  
292 and specificity ranging from 89.0% to 91.8%. The estimated performance is slightly lower in the  
293 classification of malignancies, with PPV ranging from 82.8% to 86.6% and sensitivity ranging  
294 from 80.6% to 84.6%. The model performed equally well on the test data (Fig. 3D and Table 2),  
295 indicating good generalization to new and unseen data. The model correctly predicted 84.8% of  
296 the new observations, with higher sensitivity (85.2%) compared to that estimated with training

297 data. The AUC and MCC on test data were 0.915 and 0.695, respectively, indicating a strong  
298 positive correlation between the predicted and true classes.

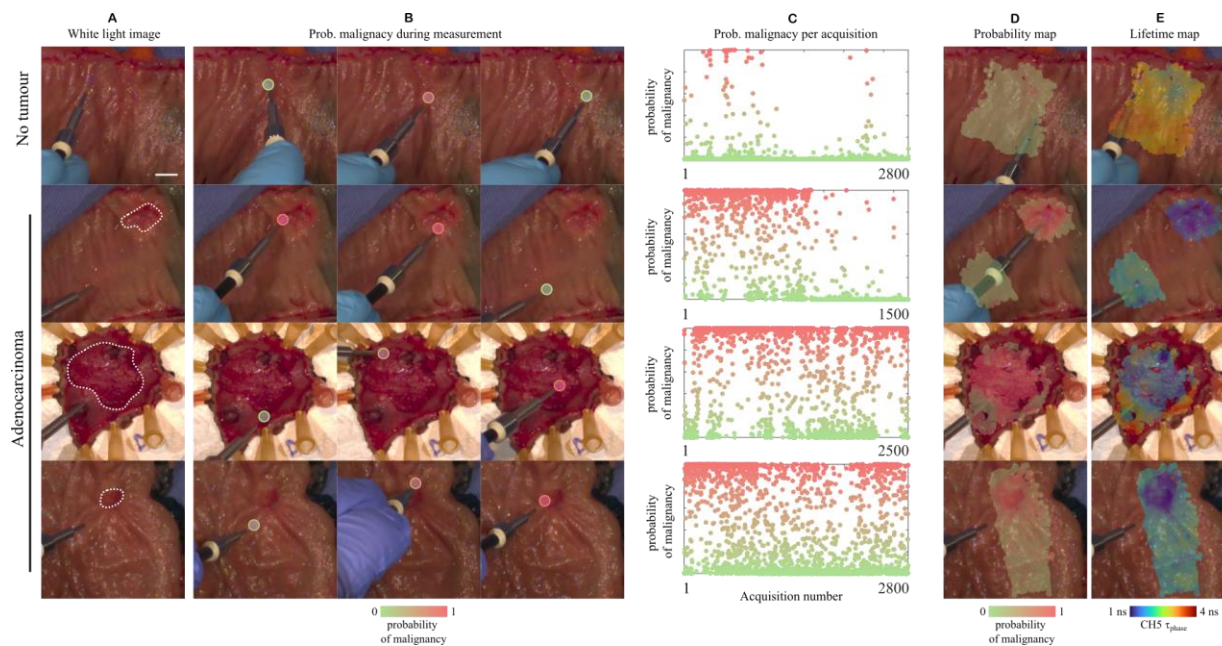

299  
300 Figure 4. Investigation of ensemble learning model-based probability of malignancy in tissue. A) White light image  
301 at time zero of normal and tumor specimens. Dotted lines delineate malignant lesions. B) Probability of malignancy  
302 estimated from single point measurements. C) Probability of malignancy for every fluorescence measurement during  
303 an entire specimen acquisition. D) Probability and E) fluorescence lifetime maps. Scale bar 10 mm.

304 After evaluating the model's performance on the independent dataset, we next investigated its  
305 applicability to individual single point measurements, as opposed to ROIs, while maintaining  
306 comparable performance. This investigation aimed to explore the applicability of the model in a  
307 scenario that more closely mimics the real-world application (e.g. single-point endoscopic  
308 navigation for identification of adenomas) and the generation of probability maps of malignancy  
309 from which resection margins can be objectively determined. Figure 4 illustrates representative  
310 results, showcasing one sample with no malignancy in the top row, contrasted with three samples  
311 exhibiting malignancy. Measurements report higher probability of malignancy as the fiber probe  
312 is moved over the tumoral regions, as depicted in Fig. 4B. As the fiber moves away from the tumor,

313 the probability of malignancy decreases accordingly. In regions devoid of malignant tumor (as in  
314 the top row), the model fails the prediction in several measurements, as depicted in Fig. 4C. This  
315 is because the model is not 100% accurate. Irrespective of that, the averaging of sequential single-  
316 point measurements mitigates these inaccuracies, resulting in relatively smooth probability maps  
317 of malignancy, from which regions of tumor can be clearly identified.

### 318 *3.3 Towards simplification of the optical setup*

319 We next investigated the impact of specific sets of features on model performance.  
320 Specifically, we aimed to understand how each channel impacted the results and whether we could  
321 achieve comparable performance with a less complex optical system. We first estimated the  
322 importance of each feature on the optimized model, over 20 iterations of cross-validation, as  
323 described in section 2.4. This was achieved by summing estimate predictor importances over all  
324 weak learners in the ensemble. Model predictors are ranked by their importance score in Fig. 5A  
325 and averaged out by channel in Fig. 5B. As hinted by our data presented in Fig. 3, channels 1 and  
326 5 are the most relevant contributors to the binary classification, except for RR. NAD(P)H  
327 autofluorescence signals (channels 2 and 3) were found to be the least important contributors to  
328 the classification.



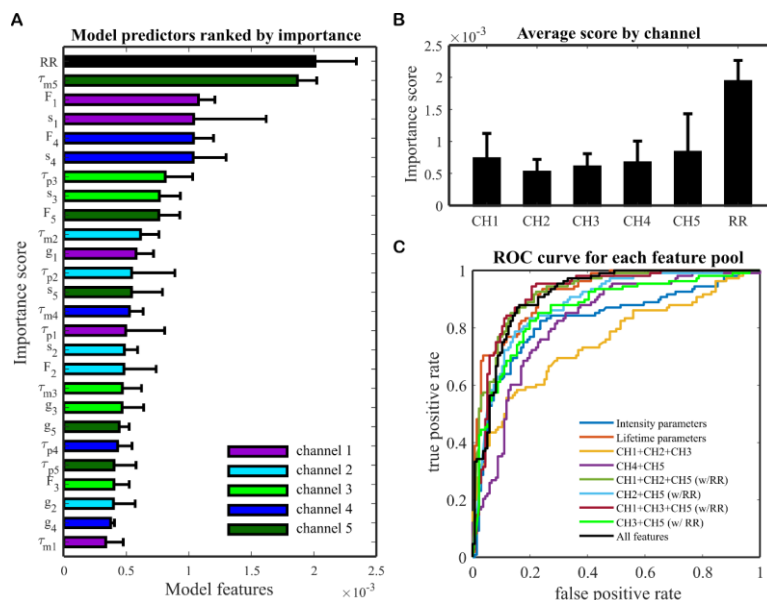

329  
 330 Figure 5. A) Predictor importance on the optimized model, estimated over 20 iterations of cross validation. B)  
 331 Average prediction importance in each detection channel of the optical setup and redox ratio. C) ROC curves  
 332 illustrating performance of classification models for different sets of features. Performance of the classifiers was  
 333 measured on test data.

334 To evaluate the impact of each subset of features in the classification performance, the model  
 335 was retrained with different feature pools. Since our aim is to simplify the optical system, we  
 336 selected groups of features that would reduce the number of optical components, detectors, or  
 337 excitation sources. For example, we investigated whether an optical system that only probes  
 338 NAD(P)H and flavins could achieve similar performance compared to a 5-channel system. The  
 339 different groups of features are listed in Table 3, together with the performance metrics on training  
 340 and test datasets. The best performance is achieved when the autofluorescence signals from key  
 341 endogenous molecules (collagens, NAD(P)H, and flavins) are all taken into consideration. Indeed,  
 342 our data indicates that channels 1, 2 or 3, and 5 can achieve similar classification performance  
 343 compared to a system with five detection channels. This is also clearly evidenced in the ROC  
 344 curves presented in Fig. 5C. If data from one of these channels is not included, the performance  
 345 drops considerably. In this context, it is also worth pointing out that two excitation wavelengths

346 perform considerably better than excitation with a single wavelength. This is because dual  
347 excitation at 375 nm and 445 nm enables optimal excitation of key endogenous fluorophores,  
348 which cannot be achieved with single excitation wavelength, whether that is at 375 or 445 nm.

349 Table 3. Classifier performance for different feature pools averaged over 20 training iterations. The ensemble was  
350 optimized for each feature pool, within the range of hyperparameters investigated.

| Feature pool                                             | $N_{\text{features}}$ | Training data     |                   |                   | Test data |         |       |
|----------------------------------------------------------|-----------------------|-------------------|-------------------|-------------------|-----------|---------|-------|
|                                                          |                       | Accuracy          | AUC-ROC           | MCC               | Accuracy  | AUC-ROC | MCC   |
| Intensity parameters only<br>(all channels and RR)       | 6                     | $0.797 \pm 0.008$ | $0.836 \pm 0.009$ | $0.567 \pm 0.018$ | 0.725     | 0.825   | 0.467 |
| Lifetime parameters only<br>(all channels)               | 20                    | $0.826 \pm 0.009$ | $0.904 \pm 0.006$ | $0.630 \pm 0.018$ | 0.824     | 0.923   | 0.646 |
| 375 nm excitation only<br>(CH1, CH2, CH3)                | 15                    | $0.809 \pm 0.012$ | $0.875 \pm 0.009$ | $0.594 \pm 0.026$ | 0.660     | 0.753   | 0.334 |
| 445 nm excitation only<br>(CH4, CH5)                     | 10                    | $0.764 \pm 0.014$ | $0.832 \pm 0.009$ | $0.500 \pm 0.031$ | 0.762     | 0.822   | 0.520 |
| Collagen, NAD(P)H and flavins<br>(CH1, CH2, CH5, and RR) | 16                    | $0.866 \pm 0.009$ | $0.935 \pm 0.006$ | $0.716 \pm 0.020$ | 0.853     | 0.924   | 0.700 |
| NAD(P)H and flavins<br>(CH2, CH5, and RR)                | 11                    | $0.833 \pm 0.010$ | $0.903 \pm 0.006$ | $0.646 \pm 0.022$ | 0.816     | 0.883   | 0.626 |
| Collagen, NAD(P)H and flavins<br>(CH1, CH3, CH5, and RR) | 16                    | $0.864 \pm 0.012$ | $0.933 \pm 0.005$ | $0.713 \pm 0.013$ | 0.848     | 0.920   | 0.694 |
| NAD(P)H and flavins<br>(CH3, CH5, and RR)                | 11                    | $0.864 \pm 0.008$ | $0.915 \pm 0.006$ | $0.713 \pm 0.017$ | 0.800     | 0.865   | 0.593 |
| All features                                             | 26                    | $0.874 \pm 0.008$ | $0.941 \pm 0.004$ | $0.733 \pm 0.022$ | 0.848     | 0.915   | 0.695 |

351

## 352 4 Discussion and Conclusions

353 The potential of multiparametric time-resolved autofluorescence imaging and spectroscopy  
354 has been extensively showcased across various clinical applications, offering label-free tissue  
355 characterization and the ability to discriminate between benign and malignant lesions.

356 Undoubtedly, this technique - assisted by AI - is well positioned to address various gaps in current  
357 clinical and surgical practice, providing a quantitative readout that can make the clinical decision  
358 more informed and objective. The work presented here provides yet another demonstration of the  
359 clinical utility and versatility of this technology. We can clearly envisage the application of this  
360 work across various scenarios and levels: integrating the technology into the surgery-to-pathology  
361 workflow to complement the efforts of pathologists, providing rapid identification of positive  
362 margins ex vivo; delineating surgical margins in vivo; and swiftly identifying and characterizing  
363 lesions during endoscopic evaluations. Our model was developed having the latter in mind, i.e. to  
364 use AI-enabled autofluorescence lifetime measurements to rapidly determine the probability of  
365 malignancy of colorectal lesions during colonoscopy, not only at the diagnostic stage, but also  
366 during treatment follow up, integrated in surveillance protocols.

367 The diagnosis of CRC traditionally relies on endoscopic evaluation followed by  
368 histopathological analysis of biopsied tissue samples. However, obtaining adequate samples,  
369 especially from large or extensive lesions, can pose challenges. Multiple biopsies are often needed,  
370 which can be time and resource consuming, and may strain pathology laboratory resources even  
371 further. Moreover, these biopsies may not fully represent the entire lesion. To address these critical  
372 limitations and enhance the speed and accuracy of diagnostic assessments during endoscopy, the  
373 application of machine learning algorithms has been explored, either on endoscopic images alone  
374 <sup>26</sup> or in combination with optical spectroscopy techniques. Among the latter, hyperspectral imaging  
375 and diffuse reflectance spectroscopy have been the preferred methods, with reported accuracy of  
376 over 90% in the classification of cancerous tissues obtained from CRC specimens <sup>27,28</sup> and in vivo  
377 <sup>29</sup>. It is however overly simplistic to view optical spectroscopic techniques solely as tools for  
378 identifying cancerous tissues. These systems offer a significant advantage by harnessing

379 spectroscopic data, offering insights that extend beyond mere tissue classification and delve into  
380 specific clinicopathological features such as staging, microsatellite instability, or depth of invasion  
381 <sup>18,30,31</sup>, which can potentially offer clues regarding oncological outcomes and response to therapy.  
382 Access to this information during endoscopic evaluation would not only streamline downstream  
383 processes, saving time and resources, but would also enable earlier and more personalized  
384 treatment decisions. This would in turn enhance the likelihood of a favorable clinical outcome.

385 In this context, we consider our study to be preliminary, with the primary objective of  
386 evaluating the potential of label-free autofluorescence lifetime measurements in distinguishing  
387 between benign and malignant colorectal lesions.

388 Real-time differentiation of benign and malignant adenomas during endoscopy is critical to  
389 improve diagnosis and treatment, as malignant adenomas signal cancer progression with risks of  
390 invasion or metastasis. Real-time detection would allow for immediate and precise intervention,  
391 reducing the need for additional procedures and preventing cancer progression. Label-free  
392 autofluorescence lifetime spectroscopy could enhance diagnostic accuracy, guide targeted polyp  
393 removal and optimize follow-up strategies, ultimately improving patient outcomes. The results of  
394 this study demonstrate that cancer tissues can be identified with high accuracy ( $90.4\% \pm 1.4\%$   
395 specificity and  $82.6\% \pm 2.0\%$  sensitivity on training data;  $84.5\%$  specificity and  $85.2\%$  sensitivity  
396 on test data; see Table 2) using an optimized ensemble learning model on 26 spectroscopic  
397 parameters obtained from multidimensional autofluorescence lifetime measurements. This  
398 performance is comparable to that reported in similar studies on CRC surgical specimens <sup>27,28,32,33</sup>,  
399 even though our study was conducted on a larger cohort. Moreover, our findings were tested on  
400 an independent and previously unseen data set, further validating the reliability of the results. As  
401 we continue to gather more data and expand the database, we expect to achieve higher performance

402 and better generalization of the model, as suggested by the results obtained when training and test  
403 data are combined into a single dataset (see Fig. S3). This will also permit further stratification of  
404 malignant data considering cancer subtype, staging, microsatellite instability, and other  
405 characteristics. Increasing the number of adenoma lesions is also clinically significant, since it was  
406 notably lower compared to the count of normal and malignant tissues (see Table 1). Consequently,  
407 we opted to group normal tissues and adenoma lesions in a single “benign” class to avoid  
408 significant imbalance of classes. We note however that adenomas have slightly different  
409 autofluorescence signatures compared to normal and malignant tissues<sup>18</sup> and this can be a  
410 confounding factor that limits the performance of the model. Notwithstanding, our model  
411 performed remarkably well in the identification of benign tissues ( $NPV_{\text{training}} = 88.0 - 89.2\%$ ;  
412  $NPV_{\text{test}} = 87.8\%$ ). Therefore, we will conduct *ex vivo* measurements in biopsy specimens collected  
413 during index and surveillance endoscopies in order to increase the count of adenomas included in  
414 the model, as there is an increased likelihood of obtaining them from these procedures.

415 The findings of this study further validate earlier observations regarding the limitations of  
416 single wavelength excitation in capturing the full autofluorescence signature of colorectal tissues.  
417 Previously, we demonstrated that dual excitation at 375 nm and 445 nm enhances the specificity  
418 of the autofluorescence signal related to clinicopathological features<sup>18</sup>. This observation is  
419 consistent with the reduced performance of the model when relying solely on features obtained  
420 from excitation at either 375 nm or 445 nm (see Table 3). As expected, the classification accuracy  
421 increases when spectroscopic features linked to collagens, NAD(P)H, and flavins are all integrated  
422 into the model. In our system, this corresponds to detection channels 1, 2 or 3, and 5. However,  
423 when utilizing solely NAD(P)H and flavins spectroscopic features, including RR, we observe a  
424 slight decrease in performance, while the accuracy remains above 80% in both training and test

425 datasets. This result suggests that, if the goal is merely the identification of malignant tissues, the  
426 system could be substantially simplified without compromising the performance, thereby  
427 improving its commercial viability.

428 One limitation of this work is the inability to obtain histology images that precisely correspond  
429 to the autofluorescence maps. This is due to the sample processing technique which aligns with  
430 the bread loaf method, where tumors are sliced vertically to the horizontal plane of the specimen,  
431 resulting histological slides are perpendicular to the autofluorescence map plane. Consequently, it  
432 is nearly impossible to trace features in the autofluorescence maps back to the histology section.  
433 As a result, our ROIs cannot be entirely validated as absolute ground truth. They are, nonetheless,  
434 the most approximate representation of the ground truth to the best of our expertise and experience.  
435 This limitation was mitigated by drawing conservative ROIs away from the borders of the lesions.  
436 Yet, finding a solution remains challenging, as it necessitates deviating from the standard  
437 workflow and adding further strain to the already stressed pathology service.

438 To conclude, in this study we demonstrate the potential of multiparametric time-resolved  
439 autofluorescence measurements in combination with ensemble learning to classify benign and  
440 malignant colorectal lesions obtained from a total of 117 patients. The classification model,  
441 leveraging spectroscopic features derived from phasor analysis across five detection channels,  
442 achieved high tumor classification accuracy (84.8%), sensitivity (84.5%), and specificity (85.2%).  
443 Additionally, the AUC-ROC of 0.915 and MCC of 0.695 further underscore its excellent  
444 performance. We envisage application of this method not only in vivo during endoscopic  
445 evaluations, but also in the rapid identification of positive margins ex vivo, thereby complementing  
446 the work of pathologists. Future work will focus on collecting more data and expanding our

447 database to enable further stratification, extending the range of our investigation beyond binary  
448 classification benign vs. malignant.

#### 449 *Disclosures*

450 The authors declare that there are no financial interests, commercial affiliations, or other potential  
451 conflicts of interest that could have influenced the objectivity of this research or the writing of this  
452 paper

#### 453 *Acknowledgements*

454 The authors thank the colorectal surgical team for their assistance in this project, including  
455 collection of samples. The authors also thank all personnel of the Champalimaud Surgical Center  
456 involved in sample collection, and all technicians from the Pathology Service and the  
457 Champalimaud Foundation Biobank for their assistance with sample preparation.

458 Alberto I. Herrando was supported by the European Union's Horizon 2020 research and innovation  
459 programme under Marie Skłodowska-Curie grant 857894 – CAST. Vladislav Shcheslavskiy was  
460 supported by RSF 23-15-00294.

#### 461 *Code, Data and Materials availability*

462 The code and dataset underlying this work are not publicly available at the time but may be  
463 obtained from the corresponding author upon reasonable request.

#### 464 *References*

465 1.Saraiva, M. R., Rosa, I. & Claro, I. Early-onset colorectal cancer: A review of current  
466 knowledge. *World Journal of Gastroenterology* vol. 29 1289–1303 Preprint at  
467 <https://doi.org/10.3748/wjg.v29.i8.1289> (2023).

- 468 2.Siegel, R. L., Wagle, N. S., Cercek, A., Smith, R. A. & Jemal, A. Colorectal cancer statistics,  
469 2023. *CA Cancer J Clin* **73**, 233–254 (2023).
- 470 3.Saito, Y. *et al.* Colonoscopy screening and surveillance guidelines. *Digestive Endoscopy* vol. 33  
471 486–519 Preprint at <https://doi.org/10.1111/den.13972> (2021).
- 472 4.Pamudurthy, V., Lodhia, N. & Konda, V. J. A. Advances in endoscopy for colorectal polyp  
473 detection and classification. *Baylor University Medical Center Proceedings* vol. 33 28–35 Preprint  
474 at <https://doi.org/10.1080/08998280.2019.1686327> (2020).
- 475 5.Robertson, D. J., Kaminski, M. F. & Bretthauer, M. Effectiveness, training and quality assurance  
476 of colonoscopy screening for colorectal cancer. *Gut* **64**, 982–990 (2015).
- 477 6.Alfonso-Garcia, A. *et al.* Real-time augmented reality for delineation of surgical margins during  
478 neurosurgery using autofluorescence lifetime contrast. *J Biophotonics* 1–12 (2019)  
479 doi:10.1002/jbio.201900108.
- 480 7.Alfonso-García, A. *et al.* First in patient assessment of brain tumor infiltrative margins using  
481 simultaneous time-resolved measurements of 5-ALA-induced PpIX fluorescence and tissue  
482 autofluorescence. *J Biomed Opt* **27**, (2022).
- 483 8.Adams, A. C. *et al.* Fibre-optic based exploration of lung cancer autofluorescence using spectral  
484 fluorescence lifetime. *Biomed Opt Express* **15**, 1132 (2024).
- 485 9.Fernandes, S. *et al.* Fibre-based fluorescence-lifetime imaging microscopy: a real-time biopsy  
486 guidance tool for suspected lung cancer. *Transl Lung Cancer Res* **13**, 355–361 (2024).
- 487 10.Phipps, J. E. *et al.* Automated detection of breast cancer in resected specimens with  
488 fluorescence lifetime imaging. *Phys Med Biol* **63**, 015003 (2017).
- 489 11.Komarova, A. D. *et al.* Metabolic heterogeneity of colorectal cancer as a prognostic factor:  
490 insights gained from fluorescence lifetime imaging. *bioRxiv* 2024.01.02.573874 (2024)  
491 doi:10.1101/2024.01.02.573874.
- 492 12.Smith, J. T. *et al.* Fast fit-free analysis of fluorescence lifetime imaging via deep learning. *Proc*  
493 *Natl Acad Sci U S A* **116**, 24019–24030 (2019).



- 494 13.Vasanthakumari, P. *et al.* Discrimination of cancerous from benign pigmented skin lesions  
495 based on multispectral autofluorescence lifetime imaging dermoscopy and machine learning. *J*  
496 *Biomed Opt* **27**, (2022).
- 497 14.Duran-Sierra, E. *et al.* Machine-learning assisted discrimination of precancerous and cancerous  
498 from healthy oral tissue based on multispectral autofluorescence lifetime imaging endoscopy.  
499 *Cancers (Basel)* **13**, (2021).
- 500 15.Unger, J. *et al.* Real-time diagnosis and visualization of tumor margins in excised breast  
501 specimens using fluorescence lifetime imaging and machine learning. *Biomed Opt Express* **11**,  
502 1216 (2020).
- 503 16.Marsden, M. *et al.* Intraoperative Margin Assessment in Oral and Oropharyngeal Cancer Using  
504 Label-Free Fluorescence Lifetime Imaging and Machine Learning. *IEEE Trans Biomed Eng* **68**,  
505 857–868 (2021).
- 506 17.Hu, L. *et al.* Label-free spatially maintained measurements of metabolic phenotypes in cells.  
507 *Front Bioeng Biotechnol* **11**, (2023).
- 508 18.Herrando, A. I. *et al.* Detection and characterization of colorectal cancer by autofluorescence  
509 lifetime imaging on surgical specimens. *Sci Rep* **14**, 24575 (2024).
- 510 19.Herrando, A. *et al.* Dual excitation spectral autofluorescence lifetime and reflectance imaging  
511 for fast macroscopic characterization of tissues. *Biomed Opt Express* (2023)  
512 doi:10.1364/BOE.505220.
- 513 20.Lagarto, J. L., Shcheslavskiy, V., Pavone, F. S. & Cicchi, R. Real-time fiber-based  
514 fluorescence lifetime imaging with synchronous external illumination: A new path for clinical  
515 translation. *J Biophotonics* **13**, (2020).
- 516 21.Ranjit, S., Malacrida, L. & Gratton, E. Differences between FLIM phasor analyses for data  
517 collected with the Becker and Hickl SPC830 card and with the FLIMbox card. *Microsc Res Tech*  
518 **81**, 980–989 (2018).

- 519 22.Hinsdale, T. *et al.* Optically sectioned wide-field fluorescence lifetime imaging microscopy  
520 enabled by structured illumination. *Biomed Opt Express* **8**, 1455 (2017).
- 521 23.Lagarto, J., Hares, J. D., Dunsby, C. & French, P. M. W. Development of Low-Cost  
522 Instrumentation for Single Point Autofluorescence Lifetime Measurements. *J Fluoresc* (2017)  
523 doi:10.1007/s10895-017-2101-7.
- 524 24.Freund, Y. & Schapire, R. E. A Decision-Theoretic Generalization of On-Line Learning and an  
525 Application to Boosting. *J Comput Syst Sci* **55**, 119–139 (1997).
- 526 25.Chicco, D. & Jurman, G. The advantages of the Matthews correlation coefficient (MCC) over  
527 F1 score and accuracy in binary classification evaluation. *BMC Genomics* **21**, (2020).
- 528 26.Zhou, D. *et al.* Diagnostic evaluation of a deep learning model for optical diagnosis of  
529 colorectal cancer. *Nat Commun* **11**, (2020).
- 530 27.Jansen-winkeln, B. *et al.* Feedforward artificial neural network-based colorectal cancer  
531 detection using hyperspectral imaging: A step towards automatic optical biopsy. *Cancers (Basel)*  
532 **13**, 1–14 (2021).
- 533 28.Saito Nogueira, M. *et al.* Diffuse reflectance spectroscopy for colorectal cancer surgical  
534 guidance: towards real-time tissue characterization and new biomarkers. *Analyst* **149**, 88–99  
535 (2023).
- 536 29.Baltussen, E. J. M. *et al.* Tissue diagnosis during colorectal cancer surgery using optical  
537 sensing: An in vivo study. *J Transl Med* **17**, (2019).
- 538 30.Nogueira, M. S. *et al.* Evaluation of wavelength ranges and tissue depth probed by diffuse  
539 reflectance spectroscopy for colorectal cancer detection. *Sci Rep* **11**, 1–17 (2021).
- 540 31.Blake, N. *et al.* Deep Learning Applied to Raman Spectroscopy for the Detection of  
541 Microsatellite Instability/MMR Deficient Colorectal Cancer. *Cancers (Basel)* **15**, (2023).
- 542 32.Ollesch, J. *et al.* Clinical application of infrared fibre-optic probes for the discrimination of  
543 colorectal cancer tissues and cancer grades. *Vib Spectrosc* **91**, 99–110 (2017).

544 33. Beaulieu, R. J. *et al.* Automated diagnosis of colon cancer using hyperspectral sensing. *The*  
545 *International Journal of Medical Robotics and Computer Assisted Surgery* **14**, (2018).

546  
547  
548 **João L. Lagarto** is the head of the Biophotonics Platform of Champalimaud Foundation. He  
549 received his MSc degree in Biomedical Engineering from NOVA University of Lisbon in 2008,  
550 and his PhD in photonics from Imperial College of London in 2014. He is the author of more than  
551 25 journal papers. His current research interests include the development and application of optical  
552 instrumentation for oncological applications, with emphasis on time-resolved autofluorescence  
553 spectroscopy.

554  
555 Biographies and photographs for the other authors are not available.

556  
557  
558 **Caption List**

559  
560 **Fig. 1** Study workflow for every collected sample. The surgical specimen is transported to the  
561 optical laboratory immediately after resection and typically within 1 hour of the last vascular  
562 ligation. Optical measurements are carried out in fresh tissue before histopathological processing  
563 and assessment. Following diagnosis, benign and malignant lesions are identified in the white light  
564 image, and regions of interest (ROI) are demarcated. Autofluorescence parameters are averaged  
565 within each ROI and mean values are taken as characteristic features. Each ROI is labelled as  
566 benign or malignant according to histopathological diagnosis. Scale bars 10 mm.

567 **Fig. 2** A) Phasor plots (top row) and phase lifetime (bottom) distribution in benign and malignant  
568 tissues for training and test dataset, measured in CH2 (left) and CH5 (right), respectively. B)  
569 Machine learning pipeline. A dataset consisting of 428 observations is used to train a boosting

570 algorithm. The best hyperparameter vector was found through Bayesian optimization with 5-fold  
571 cross-validation. Final model performance was evaluated against an independent test set consisting  
572 of 244 observations.

573 **Fig. 3** A) Phasor distribution of test data in all detection channels. B) Average phase and  
574 modulation lifetimes measured in benign (B) and malignant (M) ROIs. Panels C and D show  
575 confusion matrices for training (cross validated) and test sets, respectively. TP, TN, FP, and FN  
576 values are rounded to the closest integer following an averaging of 20 iterations. Percentage values  
577 are calculated using the original “unrounded” values. Values in parenthesis represent SD. E) ROC  
578 curves for cross validation (in cyan) and test (in orange) sets. Solid lines indicate the average ROC  
579 curves for 20 iterations of the model. Shaded lines in blue represent the ROC curve for each  
580 iteration.

581 **Fig. 4** Investigation of machine learning model-based probability of malignancy in tissue. A)  
582 White light image at time zero of normal and tumor specimens. Dotted lines delineate malignant  
583 lesions. B) Probability of malignancy estimated from single point measurements. C) Probability  
584 of malignancy for every fluorescence measurement during an entire specimen acquisition. D)  
585 Probability and E) fluorescence lifetime maps. Scale bar 10 mm.

586 **Fig. 5** A) Predictor importance on the optimized model, estimated over 20 iterations of cross  
587 validation. B) Average prediction importance in each detection channel of the optical setup and  
588 redox ratio. C) ROC curves illustrating performance of classification models for different sets of  
589 features. Performance of the classifiers was measured on test data.

590 **Table 1** Patient numbers and observations in training and test datasets.

591 **Table 2** Performance metrics for training and test datasets. Metrics on training data were obtained  
592 by averaging over 20 iterations of cross validation.

593 **Table 3** Classifier performance for different feature pools averaged over 20 training iterations.

594 The ensemble was optimized for each feature pool, within the range of hyperparameters

595 investigated.

596
